# Supplementary material for: Control of Browning, Enzyme Activity, and Quality in Stored Fresh-cut Fruit Salads through Chitosan Coating Enriched with Bergamot Juice Powder
Source: MDPI journal article supplement (doi:10.3390/foods13010147), 2024-01-01
Supplement: s1 [file s1]

**Table S1:**  $L^*$ ,  $a^*$ , and  $b^*$  color coordinates of fruit salads during storage (NC: non-coated; CH: chitosan-coated; CHBE: bergamot juice powder extract-enriched chitosan-coated)<sup>1</sup>.

|       | Fresh-cut fruit | Sample group | Storage time (day)       |                            |                           |                           |                          |                          |                          |
|-------|-----------------|--------------|--------------------------|----------------------------|---------------------------|---------------------------|--------------------------|--------------------------|--------------------------|
|       |                 |              | 0                        | 3                          | 6                         | 9                         | 12                       | 15                       | 18                       |
| $L^*$ | Apple           | NC           | 79.07±0.36 <sup>ab</sup> | 76.11±0.81 <sup>abcd</sup> | 74.83±1.05 <sup>abc</sup> | 70.74±2.04 <sup>def</sup> | 68.26±0.10 <sup>c</sup>  | 62.26±0.57 <sup>d</sup>  | 62.01±0.68 <sup>d</sup>  |
|       |                 | CH           | 80.23±2.05 <sup>a</sup>  | 78.10±1.47 <sup>ab</sup>   | 76.25±1.08 <sup>ab</sup>  | 75.10±1.80 <sup>ab</sup>  | 73.26±3.25 <sup>ab</sup> | 71.59±0.24 <sup>ab</sup> | 71.02±3.07 <sup>ab</sup> |
|       |                 | CHBE         | 80.30±1.58 <sup>a</sup>  | 78.29±2.54 <sup>a</sup>    | 77.26±0.74 <sup>a</sup>   | 76.26±0.69 <sup>a</sup>   | 75.05±0.18 <sup>a</sup>  | 73.10±0.38 <sup>a</sup>  | 72.10±1.74 <sup>a</sup>  |
|       | Pear            | NC           | 75.39±0.54 <sup>c</sup>  | 73.99±0.71 <sup>d</sup>    | 71.75±0.06 <sup>d</sup>   | 69.53±0.20 <sup>f</sup>   | 65.05±0.85 <sup>d</sup>  | 62.99±1.05 <sup>d</sup>  | 59.41±1.64 <sup>e</sup>  |
|       |                 | CH           | 76.65±2.28 <sup>bc</sup> | 74.41±2.68 <sup>cd</sup>   | 73.26±3.48 <sup>cd</sup>  | 72.05±1.20 <sup>cde</sup> | 71.05±1.47 <sup>b</sup>  | 70.52±0.58 <sup>b</sup>  | 68.52±0.21 <sup>b</sup>  |
|       |                 | CHBE         | 77.15±0.69 <sup>bc</sup> | 75.04±1.50 <sup>cd</sup>   | 74.05±1.47 <sup>bcd</sup> | 72.98±2.05 <sup>bcd</sup> | 71.82±2.04 <sup>b</sup>  | 71.07±0.25 <sup>b</sup>  | 69.41±0.06 <sup>ab</sup> |
|       | Pineapple       | NC           | 77.58±1.25 <sup>bc</sup> | 77.10±2.25 <sup>abc</sup>  | 76.40±1.47 <sup>ab</sup>  | 70.15±2.01 <sup>ef</sup>  | 68.51±0.36 <sup>c</sup>  | 66.10±0.58 <sup>c</sup>  | 65.25±0.98 <sup>c</sup>  |
|       |                 | CH           | 77.17±0.05 <sup>bc</sup> | 78.89±0.85 <sup>a</sup>    | 76.05±1.05 <sup>ab</sup>  | 74.05±1.14 <sup>abc</sup> | 71.05±1.65 <sup>b</sup>  | 70.20±1.00 <sup>b</sup>  | 69.57±0.25 <sup>ab</sup> |
|       |                 | CHBE         | 77.75±0.05 <sup>bc</sup> | 75.38±0.07 <sup>bcd</sup>  | 74.14±0.25 <sup>bcd</sup> | 73.84±0.64 <sup>bc</sup>  | 72.08±0.80 <sup>b</sup>  | 71.89±0.10 <sup>ab</sup> | 71.05±0.58 <sup>ab</sup> |
|       | Kiwi            | NC           | 59.19±2.05 <sup>d</sup>  | 58.24±1.04 <sup>e</sup>    | 56.20±0.25 <sup>e</sup>   | 54.03±0.17 <sup>h</sup>   | 53.05±0.58 <sup>f</sup>  | 49.51±0.69 <sup>f</sup>  | 48.26±0.17 <sup>g</sup>  |
|       |                 | CH           | 60.70±2.05 <sup>d</sup>  | 57.52±1.06 <sup>e</sup>    | 56.74±1.11 <sup>e</sup>   | 55.74±0.57 <sup>gh</sup>  | 55.01±0.47 <sup>ef</sup> | 54.79±2.81 <sup>e</sup>  | 54.63±3.04 <sup>f</sup>  |
|       |                 | CHBE         | 61.25±0.10 <sup>d</sup>  | 59.58±0.36 <sup>e</sup>    | 58.41±0.97 <sup>e</sup>   | 57.10±0.58 <sup>g</sup>   | 56.02±1.05 <sup>e</sup>  | 55.41±0.47 <sup>e</sup>  | 55.34±0.44 <sup>f</sup>  |
| $a^*$ | Apple           | NC           | -6.85±0.05 <sup>b</sup>  | -6.47±0.20 <sup>b</sup>    | -6.10±0.30 <sup>cd</sup>  | -5.25±0.14 <sup>b</sup>   | -5.01±0.25 <sup>d</sup>  | -4.14±0.41 <sup>c</sup>  | -4.06±0.14 <sup>d</sup>  |
|       |                 | CH           | -7.45±0.20 <sup>bc</sup> | -7.14±0.35 <sup>bc</sup>   | -7.01±0.64 <sup>cde</sup> | -6.25±0.17 <sup>bc</sup>  | -5.78±0.18 <sup>e</sup>  | -5.23±0.36 <sup>cd</sup> | -5.01±0.90 <sup>e</sup>  |
|       |                 | CHBE         | -9.01±0.05 <sup>d</sup>  | -8.50±1.02 <sup>cd</sup>   | -7.55±0.03 <sup>de</sup>  | -6.66±1.05 <sup>c</sup>   | -6.41±0.25 <sup>f</sup>  | -6.34±1.7 <sup>def</sup> | -6.24±0.45 <sup>f</sup>  |
|       | Pear            | NC           | -1.49±1.25 <sup>a</sup>  | 0.12±1.03 <sup>a</sup>     | 0.42±0.58 <sup>ab</sup>   | 0.50±1.78 <sup>a</sup>    | 1.26±0.26 <sup>b</sup>   | 2.25±0.91 <sup>ab</sup>  | 5.45±0.25 <sup>a</sup>   |
|       |                 | CH           | -1.58±0.05 <sup>a</sup>  | -1.19±1.03 <sup>a</sup>    | -0.96±1.65 <sup>b</sup>   | 0.93±0.58 <sup>a</sup>    | 1.02±0.41 <sup>b</sup>   | 1.14±0.22 <sup>b</sup>   | 3.25±0.10 <sup>b</sup>   |
|       |                 | CHBE         | -1.73±1.20 <sup>a</sup>  | -0.60±0.25 <sup>a</sup>    | 1.69±0.58 <sup>a</sup>    | 1.75±0.74 <sup>a</sup>    | 2.12±0.65 <sup>a</sup>   | 2.82±0.06 <sup>a</sup>   | 3.10±0.05 <sup>b</sup>   |
|       | Pineapple       | NC           | -7.06±0.02 <sup>b</sup>  | -6.68±1.04 <sup>b</sup>    | -5.83±0.58 <sup>c</sup>   | -5.06±0.21 <sup>b</sup>   | -4.26±0.14 <sup>c</sup>  | -3.99±0.31 <sup>c</sup>  | -2.58±0.33 <sup>c</sup>  |
|       |                 | CH           | -8.58±1.04 <sup>cd</sup> | -8.17±1.08 <sup>cd</sup>   | -7.84±0.58 <sup>e</sup>   | -6.80±0.54 <sup>c</sup>   | -6.54±0.20 <sup>f</sup>  | -6.12±0.10 <sup>de</sup> | -5.78±1.02 <sup>ef</sup> |
|       |                 | CHBE         | -8.76±1.03 <sup>cd</sup> | -8.72±1.41 <sup>d</sup>    | -8.18±1.80 <sup>e</sup>   | -7.55±0.25 <sup>cd</sup>  | -7.02±0.60 <sup>f</sup>  | -6.95±0.80 <sup>ef</sup> | -6.18±0.15 <sup>f</sup>  |
|       | Kiwi            | NC           | -12.73±1.00 <sup>e</sup> | -12.72±0.25 <sup>e</sup>   | -12.08±0.30 <sup>f</sup>  | -8.66±0.64 <sup>d</sup>   | -9.25±0.17 <sup>g</sup>  | -7.49±0.80 <sup>f</sup>  | -6.17±0.91 <sup>f</sup>  |
|       |                 | CH           | -14.58±1.02 <sup>f</sup> | -13.58±0.22 <sup>e</sup>   | -12.84±0.47 <sup>f</sup>  | -10.59±0.81 <sup>e</sup>  | -9.99±0.33 <sup>h</sup>  | -9.47±0.64 <sup>g</sup>  | -8.47±0.40 <sup>g</sup>  |
|       |                 | CHBE         | -15.25±0.03 <sup>f</sup> | -14.05±0.07 <sup>e</sup>   | -13.48±0.91 <sup>f</sup>  | -13.12±0.42 <sup>f</sup>  | -11.05±0.25 <sup>i</sup> | -10.58±0.17 <sup>g</sup> | -11.27±0.11 <sup>h</sup> |
| $b^*$ | Apple           | NC           | 28.19±0.05 <sup>g</sup>  | 28.96±0.10 <sup>g</sup>    | 30.12±0.06 <sup>e</sup>   | 30.47±0.07 <sup>f</sup>   | 30.52±0.20 <sup>e</sup>  | 33.52±0.14 <sup>d</sup>  | 35.25±0.14 <sup>c</sup>  |
|       |                 | CH           | 31.54±0.02 <sup>e</sup>  | 31.99±0.03 <sup>e</sup>    | 32.10±0.04 <sup>d</sup>   | 32.37±0.07 <sup>d</sup>   | 33.56±0.10 <sup>c</sup>  | 34.10±0.25 <sup>c</sup>  | 35.84±0.01 <sup>b</sup>  |
|       |                 | CHBE         | 31.98±0.05 <sup>d</sup>  | 32.56±0.02 <sup>d</sup>    | 34.52±0.04 <sup>c</sup>   | 35.10±0.10 <sup>b</sup>   | 35.22±0.11 <sup>b</sup>  | 36.00±0.47 <sup>a</sup>  | 36.14±0.02 <sup>a</sup>  |
|       | Pear            | NC           | 7.93±0.03 <sup>j</sup>   | 8.87±0.08 <sup>j</sup>     | 9.48±0.07 <sup>j</sup>    | 10.12±0.40 <sup>k</sup>   | 10.89±0.61 <sup>i</sup>  | 12.95±0.30 <sup>j</sup>  | 13.50±0.22 <sup>j</sup>  |
|       |                 | CH           | 8.38±0.16 <sup>k</sup>   | 9.12±0.17 <sup>k</sup>     | 10.71±0.10 <sup>i</sup>   | 10.79±0.13 <sup>j</sup>   | 11.02±0.10 <sup>i</sup>  | 11.29±0.04 <sup>k</sup>  | 13.58±0.05 <sup>j</sup>  |
|       |                 | CHBE         | 9.01±0.01 <sup>j</sup>   | 9.58±0.02 <sup>j</sup>     | 11.02±0.05 <sup>h</sup>   | 12.02±0.01 <sup>i</sup>   | 12.51±0.01 <sup>h</sup>  | 12.78±0.04 <sup>j</sup>  | 13.80±0.20 <sup>j</sup>  |
|       | Pineapple       | NC           | 37.34±0.12 <sup>c</sup>  | 36.61±0.14 <sup>c</sup>    | 35.13±0.18 <sup>b</sup>   | 34.01±0.17 <sup>c</sup>   | 30.25±0.11 <sup>e</sup>  | 27.78±0.05 <sup>h</sup>  | 24.52±0.03 <sup>h</sup>  |
|       |                 | CH           | 41.23±0.02 <sup>b</sup>  | 41.05±0.01 <sup>a</sup>    | 39.29±0.08 <sup>a</sup>   | 38.95±0.09 <sup>a</sup>   | 37.52±0.10 <sup>a</sup>  | 35.15±0.16 <sup>b</sup>  | 28.10±0.17 <sup>g</sup>  |
|       |                 | CHBE         | 42.51±0.03 <sup>a</sup>  | 37.13±0.02 <sup>b</sup>    | 39.35±0.10 <sup>a</sup>   | 34.26±0.02 <sup>c</sup>   | 32.25±0.01 <sup>d</sup>  | 30.28±0.01 <sup>f</sup>  | 30.05±0.01 <sup>f</sup>  |
|       | Kiwi            | NC           | 25.40±0.03 <sup>i</sup>  | 25.91±0.20 <sup>i</sup>    | 26.65±0.11 <sup>g</sup>   | 27.58±0.14 <sup>h</sup>   | 16.58±0.07 <sup>g</sup>  | 15.76±0.02 <sup>i</sup>  | 29.89±0.05 <sup>f</sup>  |
|       |                 | CH           | 27.10±0.05 <sup>h</sup>  | 27.16±0.14 <sup>h</sup>    | 27.41±0.20 <sup>f</sup>   | 28.01±0.10 <sup>g</sup>   | 28.54±0.11 <sup>f</sup>  | 29.51±0.21 <sup>g</sup>  | 31.25±0.03 <sup>e</sup>  |
|       |                 | CHBE         | 29.10±0.07 <sup>f</sup>  | 29.84±0.04 <sup>f</sup>    | 30.15±0.05 <sup>e</sup>   | 31.26±0.10 <sup>e</sup>   | 32.00±0.23 <sup>d</sup>  | 32.18±0.34 <sup>e</sup>  | 32.05±0.06 <sup>d</sup>  |

<sup>1</sup> Different letters in the same column (based on each analysis) indicate significant differences among the sample groups according to the Duncan's test ( $P < 0.05$ ).

**Table S2.**  $WI^*$ ,  $\Delta E^*$ ,  $\Delta C^*$ , and  $CI^*$  values of fruit salads during storage (NC: non-coated; CH: chitosan-coated; CHBE: bergamot juice powder extract-enriched chitosan-coated)<sup>1</sup>.

|              | Fresh-cut fruit | Sample group | Storage time (day)       |                          |                          |                          |                          |                          |                          |
|--------------|-----------------|--------------|--------------------------|--------------------------|--------------------------|--------------------------|--------------------------|--------------------------|--------------------------|
|              |                 |              | 0                        | 3                        | 6                        | 9                        | 12                       | 15                       | 18                       |
| $WI^*$       | Apple           | NC           | 64.23±0.18 <sup>b</sup>  | 61.90±0.46 <sup>b</sup>  | 60.28±0.67 <sup>b</sup>  | 57.43±1.37 <sup>cd</sup> | 55.68±0.04 <sup>c</sup>  | 49.35±0.36 <sup>f</sup>  | 48.02±0.41 <sup>d</sup>  |
|              |                 | CH           | 62.04±1.09 <sup>c</sup>  | 60.58±0.85 <sup>b</sup>  | 59.46±0.71 <sup>bc</sup> | 58.69±1.05 <sup>c</sup>  | 56.70±1.95 <sup>c</sup>  | 55.31±0.00 <sup>d</sup>  | 53.64±2.01 <sup>c</sup>  |
|              |                 | CHBE         | 61.37±0.88 <sup>c</sup>  | 59.95±1.57 <sup>b</sup>  | 57.98±0.37 <sup>cd</sup> | 57.11±0.46 <sup>cd</sup> | 56.36±0.05 <sup>c</sup>  | 54.61±0.09 <sup>de</sup> | 53.92±1.10 <sup>c</sup>  |
|              | Pear            | NC           | 74.10±0.54 <sup>a</sup>  | 72.52±0.64 <sup>a</sup>  | 70.20±0.03 <sup>a</sup>  | 67.89±0.05 <sup>b</sup>  | 63.37±0.62 <sup>b</sup>  | 60.73±0.84 <sup>b</sup>  | 56.88±1.44 <sup>b</sup>  |
|              |                 | CH           | 75.14±2.09 <sup>a</sup>  | 72.81±2.50 <sup>a</sup>  | 71.18±3.24 <sup>a</sup>  | 70.03±1.05 <sup>a</sup>  | 69.01±1.32 <sup>a</sup>  | 68.41±0.52 <sup>a</sup>  | 65.56±0.16 <sup>a</sup>  |
|              |                 | CHBE         | 75.38±0.72 <sup>a</sup>  | 73.26±1.40 <sup>a</sup>  | 71.76±1.29 <sup>a</sup>  | 70.38±1.82 <sup>a</sup>  | 69.10±1.81 <sup>a</sup>  | 68.25±0.21 <sup>a</sup>  | 66.30±0.03 <sup>a</sup>  |
|              | Pineapple       | NC           | 55.88±0.54 <sup>d</sup>  | 56.30±1.22 <sup>c</sup>  | 57.28±0.74 <sup>d</sup>  | 54.47±1.21 <sup>e</sup>  | 56.13±0.19 <sup>c</sup>  | 55.99±0.44 <sup>d</sup>  | 57.39±0.80 <sup>b</sup>  |
|              |                 | CH           | 52.10±0.19 <sup>e</sup>  | 53.12±0.56 <sup>d</sup>  | 53.32±0.57 <sup>e</sup>  | 52.71±0.63 <sup>f</sup>  | 52.16±0.95 <sup>d</sup>  | 53.51±0.53 <sup>e</sup>  | 58.18±0.21 <sup>b</sup>  |
|              |                 | CHBE         | 51.23±0.18 <sup>e</sup>  | 54.60±0.29 <sup>cd</sup> | 52.21±0.36 <sup>e</sup>  | 56.24±0.41 <sup>d</sup>  | 56.77±0.61 <sup>c</sup>  | 58.10±0.19 <sup>c</sup>  | 57.82±0.41 <sup>b</sup>  |
|              | Kiwi            | NC           | 50.27±1.92 <sup>ef</sup> | 49.24±0.82 <sup>e</sup>  | 47.33±0.22 <sup>f</sup>  | 45.70±0.17 <sup>g</sup>  | 49.36±0.54 <sup>c</sup>  | 46.58±0.76 <sup>g</sup>  | 39.93±0.21 <sup>f</sup>  |
|              |                 | CH           | 50.09±1.88 <sup>ef</sup> | 47.78±0.85 <sup>e</sup>  | 47.20±0.92 <sup>f</sup>  | 46.56±0.58 <sup>g</sup>  | 45.79±0.39 <sup>f</sup>  | 45.19±2.31 <sup>h</sup>  | 44.26±2.52 <sup>e</sup>  |
|              |                 | CHBE         | 49.20±0.45 <sup>f</sup>  | 47.83±0.27 <sup>e</sup>  | 46.89±0.96 <sup>f</sup>  | 45.32±0.50 <sup>g</sup>  | 44.50±0.75 <sup>f</sup>  | 44.00±0.21 <sup>h</sup>  | 43.89±0.34 <sup>e</sup>  |
| $\Delta E^*$ | Apple           | NC           | Ns                       |
|              |                 | CH           | 3.83±0.49 <sup>cd</sup>  | 3.72±0.27 <sup>bc</sup>  | 2.61±0.12 <sup>c</sup>   | 4.86±0.22 <sup>b</sup>   | 6.11±2.50 <sup>de</sup>  | 9.41±0.31 <sup>d</sup>   | 9.12±2.27 <sup>ab</sup>  |
|              |                 | CHBE         | 4.63±0.33 <sup>abc</sup> | 4.91±0.42 <sup>a</sup>   | 5.24±0.08 <sup>a</sup>   | 7.40±1.16 <sup>a</sup>   | 8.38±0.10 <sup>c</sup>   | 11.38±0.36 <sup>c</sup>  | 10.37±0.95 <sup>a</sup>  |
|              | Pear            | NC           | Ns                       |
|              |                 | CH           | 1.97±1.17 <sup>e</sup>   | 2.06±0.67 <sup>d</sup>   | 3.60±1.38 <sup>bc</sup>  | 2.90±0.64 <sup>c</sup>   | 6.02±0.60 <sup>de</sup>  | 7.82±0.30 <sup>ef</sup>  | 9.38±1.35 <sup>ab</sup>  |
|              |                 | CHBE         | 2.08±0.12 <sup>e</sup>   | 1.58±0.83 <sup>d</sup>   | 3.15±1.01 <sup>c</sup>   | 4.42±0.98 <sup>b</sup>   | 7.05±1.05 <sup>cd</sup>  | 8.13±0.85 <sup>e</sup>   | 10.29±1.49 <sup>a</sup>  |
|              | Pineapple       | NC           | Ns                       |
|              |                 | CH           | 4.38±0.36 <sup>bc</sup>  | 5.12±0.61 <sup>a</sup>   | 4.65±0.06 <sup>ab</sup>  | 6.55±0.66 <sup>a</sup>   | 8.09±0.38 <sup>c</sup>   | 8.70±0.34 <sup>de</sup>  | 6.48±0.75 <sup>b</sup>   |
|              |                 | CHBE         | 5.58±0.44 <sup>a</sup>   | 3.17±0.95 <sup>c</sup>   | 5.51±0.18 <sup>a</sup>   | 4.50±1.15 <sup>b</sup>   | 4.96±0.03 <sup>e</sup>   | 6.97±0.62 <sup>f</sup>   | 8.79±0.20 <sup>ab</sup>  |
|              | Kiwi            | NC           | Ns                       |
|              |                 | CH           | 2.93±0.00 <sup>d</sup>   | 1.68±0.04 <sup>d</sup>   | 1.38±0.31 <sup>d</sup>   | 2.63±0.13 <sup>c</sup>   | 12.14±0.02 <sup>b</sup>  | 14.94±0.94 <sup>b</sup>  | 6.94±2.79 <sup>b</sup>   |
|              |                 | CHBE         | 5.23±0.37 <sup>ab</sup>  | 4.39±0.30 <sup>ab</sup>  | 4.44±0.13 <sup>ab</sup>  | 6.55±0.32 <sup>a</sup>   | 15.81±0.23 <sup>a</sup>  | 17.73±0.33 <sup>a</sup>  | 8.99±0.67 <sup>ab</sup>  |
| $\Delta C^*$ | Apple           | NC           | Ns                       |
|              |                 | CH           | 3.40±0.06 <sup>c</sup>   | 3.10±0.10 <sup>c</sup>   | 2.19±0.16 <sup>c</sup>   | 2.15±0.02 <sup>c</sup>   | 3.14±0.08 <sup>f</sup>   | 1.24±0.09 <sup>f</sup>   | 1.16±0.68 <sup>d</sup>   |
|              |                 | CHBE         | 4.36±0.00 <sup>b</sup>   | 4.17±0.47 <sup>b</sup>   | 4.64±0.06 <sup>a</sup>   | 4.89±0.24 <sup>b</sup>   | 4.90±0.09 <sup>d</sup>   | 3.46±0.58 <sup>d</sup>   | 2.35±0.33 <sup>c</sup>   |
|              | Pear            | NC           | Ns                       |
|              |                 | CH           | 1.01±0.49 <sup>e</sup>   | 1.33±0.02 <sup>e</sup>   | 1.96±0.72 <sup>c</sup>   | 1.18±0.61 <sup>d</sup>   | 0.47±0.25 <sup>h</sup>   | 2.03±0.58 <sup>e</sup>   | 2.21±0.14 <sup>c</sup>   |
|              |                 | CHBE         | 1.11±0.01 <sup>e</sup>   | 1.14±0.44 <sup>e</sup>   | 1.99±0.01 <sup>c</sup>   | 2.34±0.86 <sup>c</sup>   | 1.90±0.33 <sup>g</sup>   | 0.84±0.50 <sup>f</sup>   | 2.37±0.19 <sup>c</sup>   |
|              | Pineapple       | NC           | Ns                       |
|              |                 | CH           | 4.24±0.46 <sup>b</sup>   | 4.68±0.14 <sup>a</sup>   | 4.62±0.09 <sup>a</sup>   | 5.24±0.18 <sup>ab</sup>  | 7.62±0.03 <sup>c</sup>   | 7.67±0.16 <sup>c</sup>   | 4.83±0.35 <sup>b</sup>   |
|              |                 | CHBE         | 5.49±0.40 <sup>a</sup>   | 2.10±0.39 <sup>d</sup>   | 4.90±0.65 <sup>a</sup>   | 2.50±0.05 <sup>c</sup>   | 3.41±0.43 <sup>e</sup>   | 3.88±0.40 <sup>d</sup>   | 6.60±0.08 <sup>a</sup>   |
|              | Kiwi            | NC           | Ns                       |
|              |                 | CH           | 2.51±0.00 <sup>d</sup>   | 1.52±0.03 <sup>e</sup>   | 1.08±0.06 <sup>d</sup>   | 1.98±0.17 <sup>c</sup>   | 11.98±0.03 <sup>b</sup>  | 13.89±0.21 <sup>b</sup>  | 2.68±0.43 <sup>c</sup>   |
|              |                 | CHBE         | 4.52±0.57 <sup>b</sup>   | 4.15±0.09 <sup>b</sup>   | 3.79±0.28 <sup>b</sup>   | 5.78±0.14 <sup>a</sup>   | 15.52±0.15 <sup>a</sup>  | 16.71±0.43 <sup>a</sup>  | 5.54±0.74 <sup>b</sup>   |
| $CI^*$       | Apple           | NC           | -3.07±0.04 <sup>a</sup>  | -2.94±0.13 <sup>c</sup>  | -2.71±0.18 <sup>cd</sup> | -2.44±0.14 <sup>b</sup>  | -2.40±0.14 <sup>c</sup>  | -1.98±0.22 <sup>c</sup>  | -1.86±0.09 <sup>cd</sup> |
|              |                 | CH           | -2.94±0.16 <sup>a</sup>  | -2.86±0.20 <sup>c</sup>  | -2.86±0.31 <sup>d</sup>  | -2.57±0.14 <sup>b</sup>  | -2.35±0.18 <sup>c</sup>  | -2.14±0.17 <sup>c</sup>  | -1.97±0.44 <sup>cd</sup> |
|              |                 | CHBE         | -3.51±0.09 <sup>a</sup>  | -3.33±0.51               | -2.83±0.04 <sup>d</sup>  | -2.49±0.42 <sup>b</sup>  | -2.43±0.11 <sup>c</sup>  | -2.41±0.69 <sup>cd</sup> | -2.39±0.23 <sup>de</sup> |
|              | Pear            | NC           | -2.49±2.12 <sup>a</sup>  | 0.18±1.57 <sup>a</sup>   | 0.62±0.85 <sup>b</sup>   | 0.71±2.50 <sup>a</sup>   | 1.78±0.24 <sup>b</sup>   | 2.76±1.01 <sup>a</sup>   | 6.80±0.01 <sup>a</sup>   |
|              |                 | CH           | -2.46±0.20 <sup>a</sup>  | -1.75±1.62 <sup>bc</sup> | -1.22±2.18 <sup>c</sup>  | 1.20±0.71 <sup>a</sup>   | 1.30±0.48 <sup>b</sup>   | 1.43±0.26 <sup>b</sup>   | 3.49±0.08 <sup>b</sup>   |
|              |                 | CHBE         | -2.49±1.75 <sup>a</sup>  | -0.83±0.37 <sup>ab</sup> | 2.07±0.66 <sup>a</sup>   | 1.99±0.79 <sup>a</sup>   | 2.36±0.65 <sup>a</sup>   | 3.10±0.04 <sup>a</sup>   | 3.24±0.00 <sup>b</sup>   |
|              | Pineapple       | NC           | -2.44±0.05 <sup>a</sup>  | -2.37±0.45 <sup>c</sup>  | -2.17±0.27 <sup>cd</sup> | -2.12±0.16 <sup>b</sup>  | -2.06±0.08 <sup>c</sup>  | -2.17±0.19 <sup>d</sup>  | -1.61±0.23 <sup>c</sup>  |
|              |                 | CH           | -2.70±0.33 <sup>a</sup>  | -2.52±0.36 <sup>c</sup>  | -2.62±0.24 <sup>cd</sup> | -2.36±0.23 <sup>b</sup>  | -2.45±0.14 <sup>c</sup>  | -2.48±0.09 <sup>cd</sup> | -2.96±0.55 <sup>e</sup>  |
|              |                 | CHBE         | -2.65±0.31 <sup>a</sup>  | -3.12±0.51 <sup>c</sup>  | -2.80±0.63 <sup>d</sup>  | -2.98±0.13 <sup>b</sup>  | -3.02±0.29 <sup>d</sup>  | -3.19±0.37 <sup>cd</sup> | -2.89±0.09 <sup>e</sup>  |
|              | Kiwi            | NC           | -8.47±0.97 <sup>b</sup>  | -8.43±0.38               | -8.07±0.27 <sup>e</sup>  | -5.81±0.48 <sup>c</sup>  | -10.52±0.35 <sup>f</sup> | -9.60±1.17 <sup>f</sup>  | -4.28±0.65 <sup>f</sup>  |
|              |                 | CH           | -8.86±0.94 <sup>b</sup>  | -8.69±0.35               | -8.26±0.52 <sup>e</sup>  | -6.78±0.61 <sup>cd</sup> | -6.36±0.29 <sup>e</sup>  | -5.86±0.74 <sup>e</sup>  | -4.96±0.52 <sup>g</sup>  |
|              |                 | CHBE         | -8.56±0.05 <sup>b</sup>  | -7.90±0.10               | -7.65±0.66 <sup>e</sup>  | -7.35±0.33 <sup>d</sup>  | -6.16±0.30 <sup>e</sup>  | -5.93±0.21 <sup>e</sup>  | -6.35±0.12 <sup>h</sup>  |

Ns: Not subjected. Since the NC group was considered as the reference, there are no  $\Delta E^*$  and  $\Delta C^*$  values.

<sup>1</sup> Different letters in the same column (based on each analysis) indicate significant differences among the sample groups according to the Duncan's test ( $P<0.05$ ).

**Table S3.** Microbial load (log CFU g<sup>-1</sup>) of fruit salads during storage (NC: non-coated; CH: chitosan-coated; CHBE: bergamot juice powder extract-enriched chitosan-coated)<sup>1</sup>.

| Analysis                          | Sample group | Storage time (day)     |                        |                        |                        |                        |                        |                        |
|-----------------------------------|--------------|------------------------|------------------------|------------------------|------------------------|------------------------|------------------------|------------------------|
|                                   |              | 0                      | 3                      | 6                      | 9                      | 12                     | 15                     | 18                     |
| Total mesophilic aerobic bacteria | NC           | 4.33±0.16 <sup>a</sup> | 4.78±0.12 <sup>a</sup> | 5.60±0.14 <sup>a</sup> | 5.87±0.10 <sup>a</sup> | 6.11±0.20 <sup>a</sup> | 6.20±0.21 <sup>a</sup> | 6.27±0.14 <sup>a</sup> |
|                                   | CH           | 3.12±0.17 <sup>b</sup> | 3.29±0.15 <sup>b</sup> | 3.40±0.10 <sup>b</sup> | 3.51±0.11 <sup>b</sup> | 3.59±0.90 <sup>b</sup> | 3.72±0.17 <sup>b</sup> | 3.76±0.15 <sup>b</sup> |
|                                   | CHBE         | 3.01±0.23 <sup>b</sup> | 3.04±0.15 <sup>b</sup> | 3.13±0.40 <sup>b</sup> | 3.15±0.22 <sup>c</sup> | 3.17±0.11 <sup>b</sup> | 3.22±0.10 <sup>c</sup> | 3.24±0.12 <sup>c</sup> |
| Total psychrotrophic bacteria     | NC           | 3.26±0.13 <sup>a</sup> | 3.50±0.07 <sup>a</sup> | 3.87±0.17 <sup>a</sup> | 4.62±0.15 <sup>a</sup> | 4.87±0.10 <sup>a</sup> | 5.05±0.11 <sup>a</sup> | 5.18±0.15 <sup>a</sup> |
|                                   | CH           | 2.96±0.10 <sup>b</sup> | 3.00±0.13 <sup>b</sup> | 3.09±0.15 <sup>b</sup> | 3.21±0.20 <sup>b</sup> | 3.59±0.14 <sup>b</sup> | 3.70±0.11 <sup>b</sup> | 3.81±0.18 <sup>b</sup> |
|                                   | CHBE         | 2.66±0.16 <sup>c</sup> | 2.68±0.24 <sup>b</sup> | 2.70±0.09 <sup>c</sup> | 2.78±0.19 <sup>c</sup> | 3.00±0.14 <sup>c</sup> | 3.02±0.21 <sup>c</sup> | 3.07±0.15 <sup>c</sup> |
| Total yeast and mold              | NC           | 3.94±0.05 <sup>a</sup> | 4.24±0.08 <sup>a</sup> | 4.50±0.10 <sup>a</sup> | 5.02±0.13 <sup>a</sup> | 5.56±0.17 <sup>a</sup> | 6.57±0.26 <sup>a</sup> | 7.09±0.01 <sup>a</sup> |
|                                   | CH           | 3.10±0.08 <sup>b</sup> | 3.12±0.06 <sup>b</sup> | 3.51±0.05 <sup>b</sup> | 3.57±0.01 <sup>b</sup> | 3.63±0.02 <sup>b</sup> | 3.67±0.05 <sup>b</sup> | 3.80±0.03 <sup>b</sup> |
|                                   | CHBE         | 2.70±0.01 <sup>c</sup> | 2.76±0.06 <sup>c</sup> | 2.80±0.01 <sup>c</sup> | 2.88±0.01 <sup>c</sup> | 2.93±0.04 <sup>c</sup> | 3.08±0.07 <sup>c</sup> | 3.11±0.04 <sup>c</sup> |
| Total <i>Enterobacteriaceae</i>   | NC           | 3.43±0.01 <sup>a</sup> | 3.47±0.02 <sup>a</sup> | 3.48±0.02 <sup>a</sup> | 3.75±0.05 <sup>a</sup> | 3.86±0.03 <sup>a</sup> | 3.98±0.02 <sup>a</sup> | 4.19±0.01 <sup>a</sup> |
|                                   | CH           | 2.13±0.05 <sup>b</sup> | 2.18±0.08 <sup>b</sup> | 2.30±0.04 <sup>b</sup> | 2.57±0.04 <sup>b</sup> | 2.60±0.10 <sup>b</sup> | 2.64±0.08 <sup>b</sup> | 2.50±0.12 <sup>b</sup> |
|                                   | CHBE         | 2.07±0.01 <sup>c</sup> | 2.09±0.13 <sup>b</sup> | 2.11±0.07 <sup>c</sup> | 2.15±0.04 <sup>c</sup> | 2.24±0.05 <sup>c</sup> | 2.29±0.02 <sup>c</sup> | 2.30±0.10 <sup>c</sup> |

<sup>1</sup> Different letters in the same column (based on each analysis) indicate significant differences among the sample groups according to the Duncan's test ( $P<0.05$ ).

**Table S4.** Sensory scores (rating out of 5) of fruit salads during storage (NC: non-coated; CH: chitosan-coated; CHBE: bergamot juice powder extract-enriched chitosan-coated)<sup>1</sup>.

| Analysis           | Sample group | Storage time (day)     |                        |                        |                        |                        |                         |                        |
|--------------------|--------------|------------------------|------------------------|------------------------|------------------------|------------------------|-------------------------|------------------------|
|                    |              | 0                      | 3                      | 6                      | 9                      | 12                     | 15                      | 18                     |
| Odor               | NC           | 5.00±0.00 <sup>a</sup> | 3.81±0.43 <sup>b</sup> | 3.25±0.50 <sup>b</sup> | 1.75±0.83 <sup>b</sup> | 1.00±0.00 <sup>c</sup> | 1.00±0.00 <sup>c</sup>  | 1.00±0.00 <sup>c</sup> |
|                    | CH           | 5.00±0.00 <sup>a</sup> | 5.00±0.00 <sup>a</sup> | 4.50±0.25 <sup>a</sup> | 4.20±0.45 <sup>a</sup> | 4.00±0.71 <sup>b</sup> | 3.25±0.96 <sup>b</sup>  | 3.10±0.77 <sup>b</sup> |
|                    | CHBE         | 5.00±0.00 <sup>a</sup> | 5.00±0.00 <sup>a</sup> | 5.00±0.00 <sup>a</sup> | 5.00±0.00 <sup>a</sup> | 4.90±0.07 <sup>a</sup> | 4.80±0.14 <sup>a</sup>  | 4.65±0.21 <sup>a</sup> |
| Texture            | NC           | 5.00±0.00 <sup>a</sup> | 4.80±0.15 <sup>b</sup> | 4.05±0.18 <sup>a</sup> | 3.75±1.16 <sup>a</sup> | 2.70±0.50 <sup>b</sup> | 2.10±0.35 <sup>b</sup>  | 1.54±0.27 <sup>c</sup> |
|                    | CH           | 5.00±0.00 <sup>a</sup> | 5.00±0.00 <sup>a</sup> | 4.80±0.27 <sup>a</sup> | 4.50±0.42 <sup>a</sup> | 4.00±0.80 <sup>a</sup> | 3.70±0.79 <sup>ab</sup> | 3.25±0.49 <sup>b</sup> |
|                    | CHBE         | 5.00±0.00 <sup>a</sup> | 5.00±0.00 <sup>a</sup> | 4.90±0.10 <sup>a</sup> | 4.88±0.24 <sup>a</sup> | 4.70±0.18 <sup>a</sup> | 4.60±1.80 <sup>a</sup>  | 4.54±0.40 <sup>a</sup> |
| Appearance         | NC           | 4.50±0.50 <sup>a</sup> | 3.00±1.00 <sup>b</sup> | 2.69±0.12 <sup>b</sup> | 1.97±1.23 <sup>b</sup> | 1.00±0.12 <sup>c</sup> | 1.00±0.00 <sup>c</sup>  | 1.00±0.00 <sup>c</sup> |
|                    | CH           | 5.00±0.00 <sup>a</sup> | 5.00±0.00 <sup>a</sup> | 4.90±0.10 <sup>a</sup> | 4.50±0.42 <sup>a</sup> | 4.30±0.35 <sup>b</sup> | 3.70±0.19 <sup>b</sup>  | 3.25±0.49 <sup>b</sup> |
|                    | CHBE         | 5.00±0.00 <sup>a</sup> | 5.00±0.00 <sup>a</sup> | 5.00±0.00 <sup>a</sup> | 4.95±0.15 <sup>a</sup> | 4.92±0.06 <sup>a</sup> | 4.87±0.35 <sup>a</sup>  | 4.75±0.19 <sup>a</sup> |
| Taste              | NC           | 5.00±0.00 <sup>a</sup> | 3.85±0.35 <sup>b</sup> | 1.80±1.42 <sup>b</sup> | Ns                     | Ns                     | Ns                      | Ns                     |
|                    | CH           | 4.85±0.15 <sup>a</sup> | 4.50±0.20 <sup>a</sup> | 4.38±0.43 <sup>a</sup> | 4.00±0.71 <sup>a</sup> | 3.92±0.47 <sup>a</sup> | 3.25±0.49 <sup>b</sup>  | 3.00±0.22 <sup>b</sup> |
|                    | CHBE         | 4.95±0.05 <sup>a</sup> | 4.70±0.10 <sup>a</sup> | 4.61±0.21 <sup>a</sup> | 4.52±0.37 <sup>a</sup> | 4.30±0.26 <sup>a</sup> | 4.08±0.26 <sup>a</sup>  | 3.74±0.34 <sup>a</sup> |
| Overall preference | NC           | 5.00±0.00 <sup>a</sup> | 3.50±0.50 <sup>b</sup> | 2.70±1.12 <sup>b</sup> | 2.05±1.19 <sup>b</sup> | 1.00±0.50 <sup>c</sup> | 1.00±0.00 <sup>c</sup>  | 1.00±0.00 <sup>c</sup> |
|                    | CH           | 4.80±0.20 <sup>a</sup> | 4.70±0.20 <sup>a</sup> | 4.30±0.54 <sup>a</sup> | 4.10±0.45 <sup>a</sup> | 3.90±0.65 <sup>b</sup> | 3.75±0.19 <sup>b</sup>  | 3.15±0.40 <sup>b</sup> |
|                    | CHBE         | 5.00±0.00 <sup>a</sup> | 5.00±0.00 <sup>a</sup> | 5.00±0.00 <sup>a</sup> | 4.96±0.47 <sup>a</sup> | 4.90±0.17 <sup>a</sup> | 4.72±0.26 <sup>a</sup>  | 4.56±0.44 <sup>a</sup> |

Ns: Not subjected. Fruit have not been consumed in the following periods.

<sup>1</sup> Different letters in the same column (based on each parameter) indicate significant differences among the sample groups according to the Duncan's test ( $P<0.05$ ).
